# THE AMERICAN JOURNAL OF PSYCHIATRY

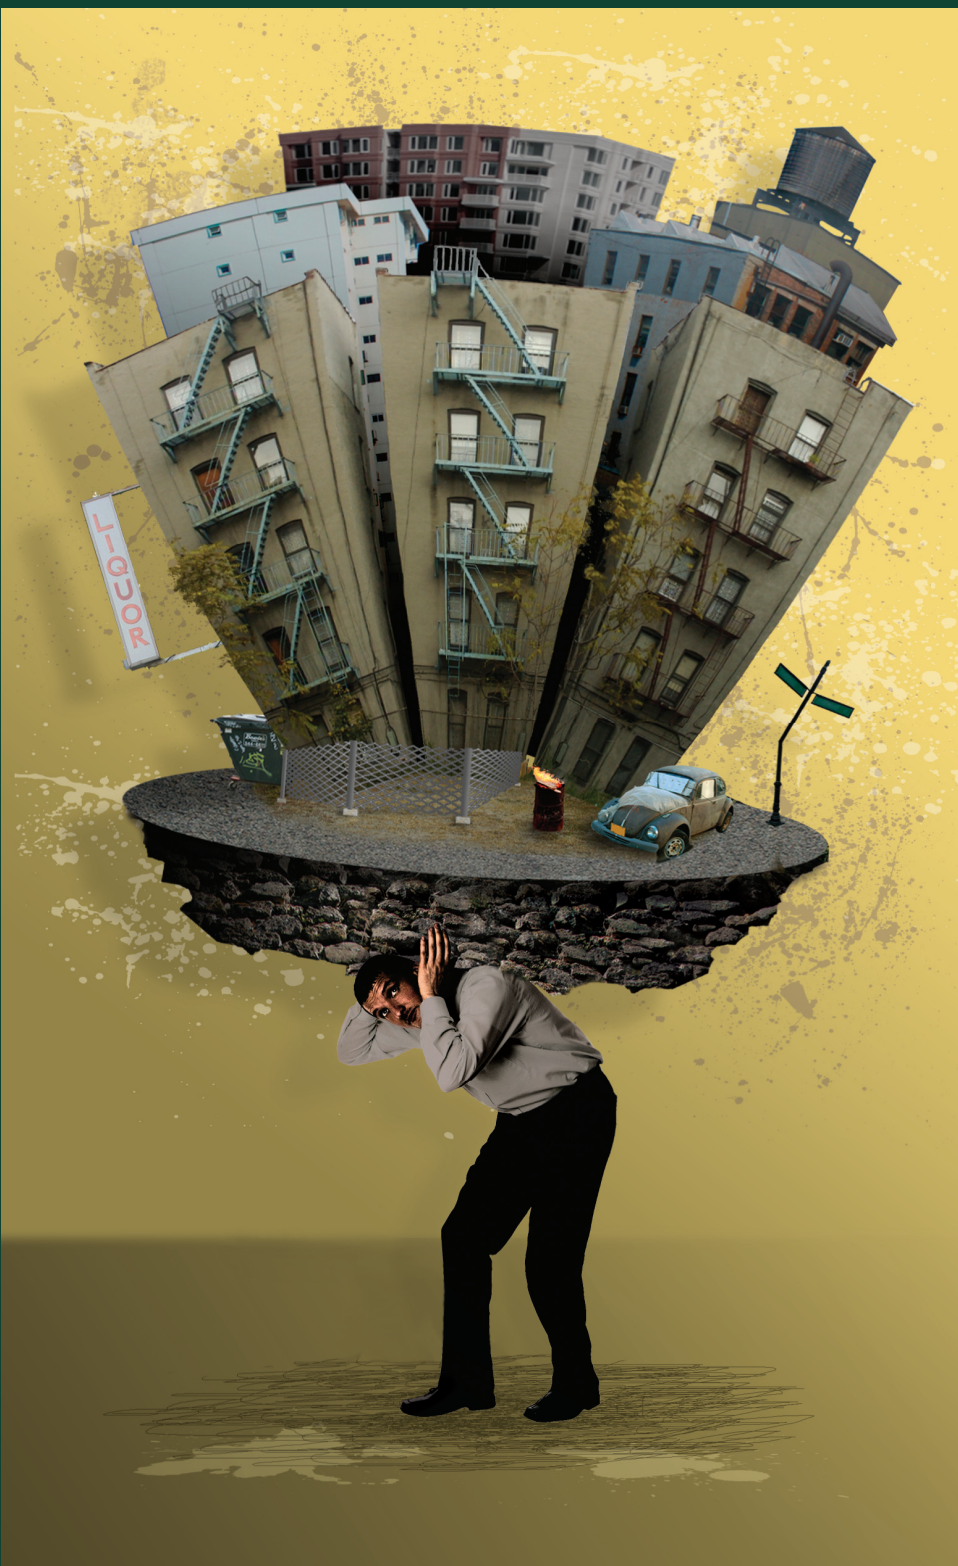

Genome-Wide Linkage and  
Follow-Up Association Study of  
Postpartum Mood Symptoms  
Pamela Belmonte Mahon, Ph.D., et al. 1229

Enhancing Multiyear Guideline  
Concordance for Bipolar Disorder  
Through Collaborative Care  
Mark S. Bauer, M.D., et al. 1244

Association of Pre-Onset Cannabis,  
Alcohol, and Tobacco Use With  
Age at Onset of Prodrome and  
Age at Onset of Psychosis in  
First-Episode Patients  
Michael T. Compton, M.D., M.P.H., et al. 1251

◀ The Influence of Neighborhood  
Environment on Treatment  
Continuity and Rehospitalization  
in Dually Diagnosed Patients  
Discharged From Acute  
Inpatient Care  
Gerald J. Stahler, Ph.D., et al. 1258

Continuing Medical Education 1305

November 2009

Volume 166 • Number 11

Official Journal of the  
AMERICAN PSYCHIATRIC ASSOCIATION

[ajp.psychiatryonline.org](http://ajp.psychiatryonline.org)
