# READ The American Journal of PSYCHIATRY ONLINE

## ONLINE BENEFITS

### AJP in Advance

Receive key research articles posted on the AJP website well in advance of their appearance in print.

### Back Issue Access

Gain access to back issues starting with Volume 1, Issue 1 of the American Journal of Insanity in 1844. (Available to institutions as a separate one-time purchase.)

### AJP CME

Take interactive quizzes that offer AMA PRA Category 1 Credits™ for selected articles from each issue (with paid subscription to the CME Course Program).

### AJP Audio

Listen to MP3-format program summarizing findings from key articles from each issue.

### Residents' Journal

Read additional AJP articles and features that have most value to residents in their training.

### Powerful Searching

Search by author, keyword, and/or citation details—within any one journal, across the entire PsychiatryOnline journal collection, or across all HighWire journals.

### PubMed, CrossRef, and Google Scholar links

Explore everything from cited references to abstracts and full text; to similar articles; to other articles by the same lead authors.

### eTOCs

Get advanced email alerts with the table of contents of the latest issue.

ACTIVATE NOW!

IT'S AS EASY AS...

2 Under SUBSCRIBE NOW, click "Activate Your Online Access"

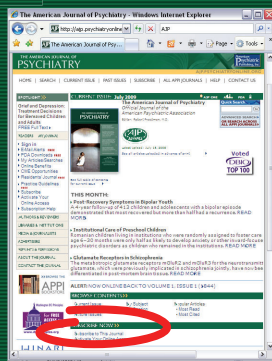

3 Go to [ajp.psychiatryonline.org](http://ajp.psychiatryonline.org)  
Enter your APA Member Number. (This can be found on your mailing label.)

AJP 3000056866 CAR-RT LOT88 C-105  
John Q Sample  
Mental Health Professional  
1000 Wilson Blvd STE 1825  
Arlington VA 22209-3924 01654

\*In most cases the number on your label will be your Member Number; if it is not, enter your APA Member Number (with enough leading zeros to create 10 digits).

For more information or if you cannot locate your customer number, please contact APPI Customer Service:

1.800.368.5777  
APPI@PSYCH.ORG

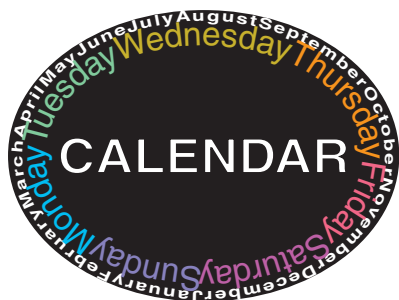

For free listing of your organization's official annual or regional meeting, please send us the following information: sponsor, location, inclusive dates, type and number of continuing education credits (if available), and the name, address, and telephone number of the person or group to contact for more information. In order for an event to appear in our listing, all notices and changes must be received at least 6 months in advance of the meeting and should be addressed to:

*Calendar, American Journal of Psychiatry, 1000 Wilson Boulevard, Suite 1825, Arlington, VA 22209-3901, jblair@psych.org (e-mail).*

*Because of space limitations, only listings of meetings of the greatest interest to Journal readers will be included.*

## NOVEMBER

**November 5–6**, 21st Annual Advances in Psychiatry, Ann Arbor, MI. Contact: Office of Continuing Medical Education, University of Michigan Medical School, G1200 Towsley Center, 1500 E. Medical Center Drive, SPC 5201, Ann Arbor, MI 48109-5201; (734) 763-1400 (tel), (734) 936-1641 (fax) OCME@umich.edu (e-mail), <http://cme.med.umich.edu> (web site).

**November 11–14**, 56th Annual Meeting, Academy of Psychosomatic Medicine, Las Vegas, Nev. Contact: [www.apm.org](http://www.apm.org) (web site).

## DECEMBER

**December 4–5**, Third Annual International Brain Conference, Orlando, Fl. Contact: 407-644-1122 (tel), [www.brainconference.org](http://www.brainconference.org) (web site).

## MARCH 2010

**March 17–20**, 21st Annual Meeting, American Neuropsychiatric Association, Tampa, Fla. Contact: [www.anpaonline.org](http://www.anpaonline.org) (web site).

**March 17–20**, 4th Biennial Conference of the ISBD, San Paulo, Brazil. Contact: [isbd2010@icms.com.au](mailto:isbd2010@icms.com.au) (e-mail), [www.isbd2010.org](http://www.isbd2010.org) (web-site).

## APRIL

**April 9–11**, The Annual Fay Lecture Series in Analytical Psychology, "Connecting with South Africa: Inter-Cul-

tural Communication and Understanding," Texas A&M University, College Station, Texas. Contact: (979) 845-2530 tel, [drosen@psych.tamu.edu](mailto:drosen@psych.tamu.edu) (e-mail).

## MAY

**May 20–23**, 54th Annual Meeting of the American Adademy of Psychoanalysis and Dynamic Psychiatry, New Orleans, LA. Contact: Executive Office, American Adademy of Psychoanalysis and Dynamic Psychiatry, PO Box 30, Bloomfield, CT 06002; (888) 691-8281, (860) 286-0787, [info@aapdp.org](mailto:info@aapdp.org) (e-mail), [www.aapdp.org](http://www.aapdp.org) (web site).

**May 22–27**, 163rd Annual Meeting of the American Psychiatric Association, New Orleans, LA. Contact: Cathy Nash, APA Annual Meetings Dept., 1000 Wilson Blvd., Ste. 1825, Arlington, VA 22209; (703) 907-7822.

## SEPTEMBER

**September 14–19**, 1st joint annual meeting of the EEG and Clinical Neuroscience Society (ECNS), International Society for Neuroimaging in Psychiatry (ISNIP) and the International Society for Brain Electromagnetic Topography (ISBET), Istanbul, Turkey. Contact: Kemal Arikan [mkarikan@istanbul.edu.tr](mailto:mkarikan@istanbul.edu.tr) (e-mail) [www.ecns2010.com](http://www.ecns2010.com) (web site).

## OCTOBER

**October 14–17**, 62nd Institute on Psychiatric Services, American Psychiatric

Association, Boston, MA. Contact: Jill Gruber, APA Annual Meetings Dept., 1000 Wilson Blvd., Ste. 1825, Arlington, VA 22209; (703) 907-7815.

**October 26–31**, 57th Annual Meeting of the American Academy of Child and Adolescent Psychiatry, New York, NY. Contact: AACAP, 3615 Wisconsin Avenue, N.W., Washington, DC 20016-3007; (202) 966-7300 (tel), (202) 966-2891 (fax), [meetings@aacap.org](mailto:meetings@aacap.org) (e-mail), [www.aacap.org](http://www.aacap.org) (web site).

## MAY 2011

**May 14–19**, 164th Annual Meeting of the American Psychiatric Association, Honolulu, HI. Contact: Cathy Nash, APA Annual Meetings Dept., 1000 Wilson Blvd., Ste. 1825, Arlington, VA 22209; (703) 907-7822.

## OCTOBER

**October 18–23**, 58th Annual Meeting of the American Academy of Child and Adolescent Psychiatry, Toronto, Ontario. Contact: AACAP, 3615 Wisconsin Avenue, N.W., Washington, DC 20016-3007; (202) 966-7300 (tel), (202) 966-2891 (fax), [meetings@aacap.org](mailto:meetings@aacap.org) (e-mail), [www.aacap.org](http://www.aacap.org) (web site).

**October 27–30**, 63rd Institute on Psychiatric Services, American Psychiatric Association, San Francisco, CA. Contact: Jill Gruber, APA Annual Meetings Dept., 1000 Wilson Blvd., Ste. 1825, Arlington, VA 22209; (703) 907-7815.

# get CME from AJP

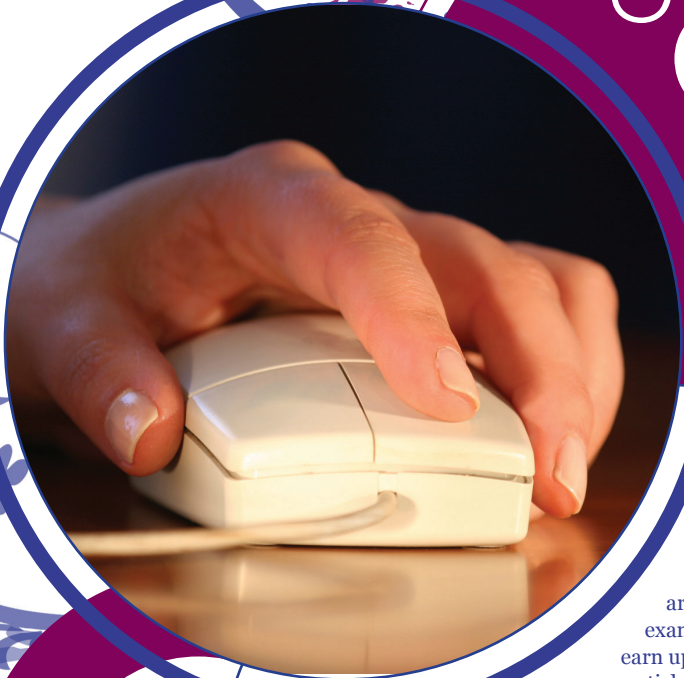

Brief companion exams are created for three of the most influential articles from each issue. By reading the articles and completing the online exams, you can test your knowledge and earn up to 1 AMA PRA Category 1 Credits™ per article. Correct answers are highlighted for your reference upon completion of the course; there is no minimum threshold score necessary for the credit. A link from the question to the correct answer in context will also be highlighted in the associated article, thus extending the learning experience.

CME credit is only provided online, and a subscription to the AJP CME program is required. From the moment you subscribe to the AJP CME program, you will be able to select from 72 courses from among 40 possible subject areas. You'll also be able to access the next 33 courses as they become available. For more information and pricing, please go to <http://cme.psychiatryonline.org/misc/aboutajpcme.shtml>

This activity is sponsored by the American Psychiatric Association. The American Psychiatric Association is accredited by the Accreditation Council for Continuing Medical Education to provide continuing medical education for physicians. The American Psychiatric Association designates this educational activity for a maximum of 1 AMA PRA Category 1 Credits™. Physicians should only claim credit commensurate with the extent of their participation in the activity.

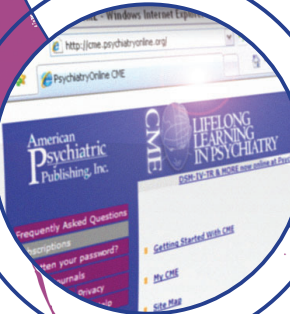

Fulfill your CME requirement while staying current on the latest advances in psychiatry.  
Subscribe to AJP CME!

# The Residents' JOURNAL

Last Issue's

## Table of Contents

- 1 Reflections on Teaching Cultural Psychiatry  
Jennifer Alt, M.D.
- 3 Bridging the Gap Between Modern Psychiatry and Cultural Beliefs in the Treatment of Culture-Bound Syndromes  
Monique Upton, M.D.,  
Dale Givens, Jr., M.D.
- 5 Managing Acute, Dangerous Behavior as an On-Call House Officer  
Joseph M. Cerimele, M.D.
- 6 The Influence of Social Media on Healthcare: Reassessing Confidentiality, Boundaries, and Guidelines  
Otis Anderson, III, M.D.
- 7 Book Reviews: *Atmospheric Disturbances and The Forgery of Venus*  
Laura A. Bajor, D.O.

The Residents' Journal is sent free-of-charge to all psychiatry residents. Anyone interested in being included on the distribution list should contact Angela Moore, the Residents' Journal staff editor at [ajp@psych.org](mailto:ajp@psych.org) with "Subscribe to Residents' Journal" in the subject line.

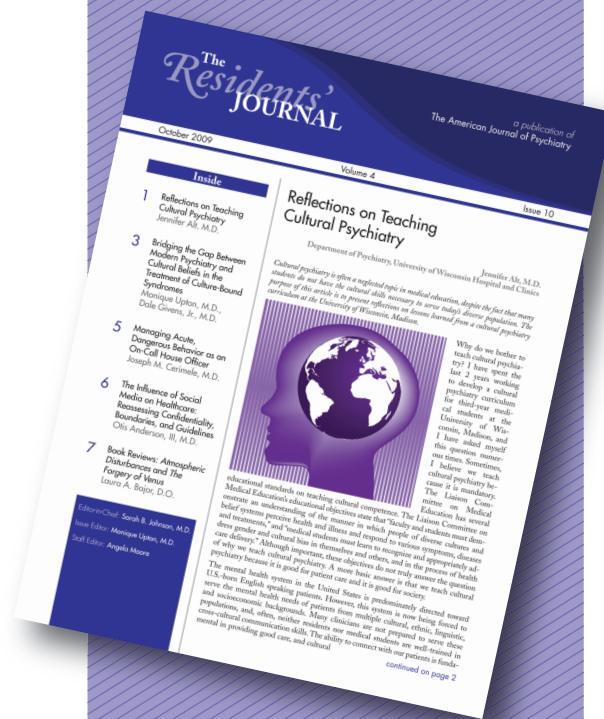

a publication of  
The American Journal of Psychiatry



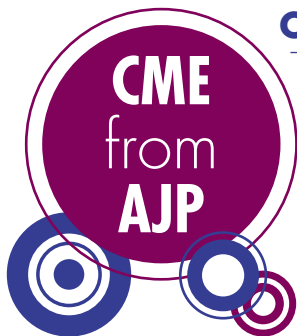

## Continuing Medical Education

Three articles in this issue form the basis of a short course with questions that can be answered for up to 1 hour of category 1 CME credit each by visiting <http://cme.psychiatryonline.org/> and clicking on “American Journal of Psychiatry CME.”

CME credit is issued only online, and a paid subscription to the AJP CME course program is required.

This month's courses appear on pages 1305–1308.

FREE AUDIO!

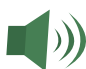

## Have You Heard?

You can listen to highlights of *The American Journal of Psychiatry* by downloading a monthly free .mp3 audio file from our web site (<http://ajp.psychiatryonline.org/misc/audio.dtl>) or by subscribing to the AJP Audio podcast at iTunes or other feed reader (e.g., NewzCrawler, FeedDemon, Bloglines, Google Reader). Presented by Deputy Editor Dr. Susan Schultz or by Editorial Director Michael Roy, each month's audio lasts approximately 30 minutes and covers several research articles, the Treatment in Psychiatry feature, and one or two editorials.

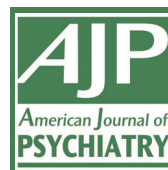

Coming in the December 2009 issue\*

## THE AMERICAN JOURNAL OF PSYCHIATRY

### *Increased Mortality in Bulimia Nervosa and Other Eating Disorders*

S.J. Crow, C.B. Peterson, S.A. Swanson, N.C. Raymond, S. Specker, E.D. Eckert, and J.E. Mitchell

### *The Efficacy of Self-Help Group Treatment and Therapist-Led Group Treatment for Binge Eating Disorder*

C.B. Peterson, J.E. Mitchell, S.J. Crow, R.D. Crosby, and S.A. Wonderlich

### *Randomized controlled trial of out-patient mentalization based treatment versus structured clinical management for borderline personality disorder*

A. Bateman and P. Fonagy

### *A Randomized Trial of Dialectical Behavior Therapy Versus General Psychiatric Management for Borderline Personality Disorder*

S.F. McMain, P.S. Links, W.H. Gnam, T. Guimond, R.J. Cardish, L. Korman, and D.L. Streiner

\*Can't wait? Visit [ajp.psychiatryonline.org](http://ajp.psychiatryonline.org) and click the “AJP in Advance” logo to see all articles uploaded in advance of print!

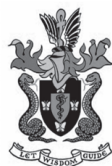

# THE BRITISH JOURNAL OF PSYCHIATRY

October 2009, VOL. 195

- A10 Editorial Board  
A12 Highlights of this issue
- Editorials**
- 281 **The moral content of psychiatric treatment**  
S. Pearce and H. Pickard
- 283 **Implementation science: understanding the translation of evidence into practice**  
M. Tansella and G. Thornicroft
- 285 **Professor Freud and hysteria – 100 years ago**  
H. Rollin
- Review article**
- 286 **Age at onset and cognition in schizophrenia: meta-analysis**  
T.K. Rajji, Z. Ismail, and B.H. Mulsant
- 293 **The *essa zarah*, the strange women of the Book of Proverbs - psychiatry in the Old Testament**
- Papers**
- 294 **Maternal tobacco, cannabis and alcohol use during pregnancy and risk of adolescent psychotic symptoms in offspring**  
S. Zammit, K. Thomas, A. Thompson, J. Horwood, P. Menezes, D. Gunnell, C. Hollis, D. Wolke, G. Lewis, and G. Harrison
- 301 **Structure of genetic and environmental risk factors for dimensional representations of DSM-IV anxiety disorders**  
K. Tambs, N. Czajkowsky, E. Roysamb, M.C. Neale, T. Reichborn-Kjennerud, S.H. Aggen, J.R. Harris, R.E. Ørstavik, and K.S. Kendler
- 308 **Cost-effectiveness of a primary care model for anxiety disorders**  
H.-H. König, A. Born, D. Heider, H. Matschinger, S. Heinrich, S.G. Riedel-Heller, D. Surall, M.C. Angermeyer, and C. Roick
- 317 **Her Kind – poem**  
Anne Sexton
- 318 **Long-term effectiveness of a parenting intervention for children at risk of developing conduct disorder**  
T. Bywater, J. Hutchings, D. Daley, C. Whitaker, S.T. Yeo, K. Jones, C. Eames, and R.T. Edwards
- 325 **How mothers with borderline personality disorder relate to their year-old infants**  
R.P. Hobson, M.P.H. Patrick, J.A. Hobson, L. Crandell, E. Bronfman, and K. Lyons-Ruth
- 331 **Psychiatric disorders and other health dimensions among Holocaust survivors 6 decades later**  
A. Sharon, I. Levav, J. Brodsky, A.A. Shemesh, and R. Kohn
- 336 **Neuropsychological functioning in first-episode schizophrenia**  
E. Kravariti, K. Morgan, P. Fearon, J.W. Zanelli, J.M. Lappin, P. Dazzan, C. Morgan, G.A. Doody, G. Harrison, P.B. Jones, R.M. Murray, and A. Reichenberg
- 346 **Effect of age at onset of schizophrenia on white matter abnormalities**  
M. Kyriakopoulos, R. Perez-Iglesias, J.B. Woolley, R.A.A. Kanaan, N.S. Vyas, G.J. Barker, S. Frangou, and P.K. McGuire
- 353 **Jason Bourne's amnesia – in 100 words**  
Sean Spence
- 354 **Mental health research priorities in low- and middle-income countries of Africa, Asia, Latin America and the Caribbean**  
P. Sharan, C. Gallo, O. Gureje, E. Lamberte, J.J. Mari, G. Mazzotti, V. Patel, L. Swartz, S. Olifson, I. Levav, A. de Francisco, S. Saxena, for the World Health Organization-Global Forum for Health Research - Mental Health Research Mapping Project Group
- 364 **Invited commentary on . . . Mental health research priorities in low- and middle-income countries**  
R. Araya
- Short report**
- 366 **Confectionery consumption in childhood and adult violence**  
S.C. Moore, L.M. Carter, and S.H.M. van Goozen
- Columns**
- 368 **Correspondence**
- 371 **Corrections**
- 372 **Book reviews**
- 376 **Contents of *Advances in Psychiatric Treatment***
- 377 **Contents of the *American Journal of Psychiatry***
- 378 **From the Editor's desk**
